# Supplementary material for: MVDA: a multi-view genomic data integration methodology
Source: PubMed Central journal article supplement (PMC4539887; doi:10.1186/s12859-015-0680-3), 2015-08-19
Supplement: 12859_2015_680_MOESM1_ESM.pdf [file 12859_2015_680_MOESM1_ESM.pdf]

# MVDA: A multi-view genomic data integration methodology: Supplementary Materials

A. Serra, M. Fratello, V. Fortino, G. Raiconi, R. Tagliaferri and D. Greco

## Prototype Extraction

In this section intermediate results of step one of the methodology is reported. As a preliminary step, for all dataset, feature with low variance are eliminated. Variance was evaluated for each feature and then the cumulative function of the variance was calculated. The the cumulative function was cut at different level as showed in an example in figure 1.

Then feature were clustered by correlation in order to remove feature redundancy and reduce their number.

Here are reported evaluation metrics for each algorithm in clustering feature as described in section material and method of the manuscript. For each dataset the best two algorithms that reach higher value of the metric were selected.

In figures 2 3 4 5 6 we can see the algorithms behavior by varying the value of K. More details are shown in table 1.

**Figure 1** Feature ranking cut: here 15 reported, as example, the feature ranking cut for the gene expression view of the OXF.BRC.1 dataset. Feature ranking was performed with the Cat-t score method on the prototypes obtained with the Pam algorithm. As we can see, in order to achieve the 60% of the cumulative ranking score 53 prototypes were needed, 71 for 70%, 93 for 80% and 126 on 90%. In this example there were 200 prototypes at all.

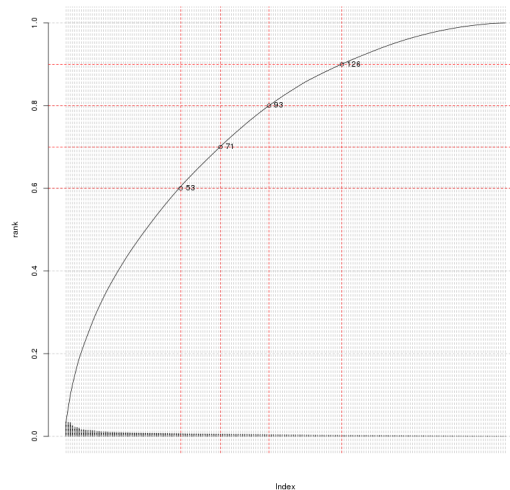

**Table 1** Results after step 1: Here we show the results of the two best algorithms used in order to cluster elements in each view for each dataset. For each dataset the top 20% of features were selected.  $N$  is the number of patients in each dataset. Apart for Pvcust algorithm that automatically finds the number of clusters, the optimal value of  $K$  was calculated as described in section Material and Methods (the optimal values are those in the red lines). For each dataset the two best algorithms that maximize the index (bold value) were selected

| View                                                                                                         | Feature | Variable Feature | SOM        | Pam         | K-means     | Ward        | Spectral    | Pvcust      |            |             |
|--------------------------------------------------------------------------------------------------------------|---------|------------------|------------|-------------|-------------|-------------|-------------|-------------|------------|-------------|
| <b>Breast cancer patient samples from The Cancer Genome Atlas (TCGA), N = 151</b>                            |         |                  |            |             |             |             |             |             |            |             |
| RNASeq                                                                                                       | 20510   | 4100             | Prototype  |             |             |             |             | Prototype   | Index      |             |
|                                                                                                              |         |                  | 100        | 0,82        | 0,84        | 0,77        | 0,83        | 0,82        | <b>297</b> | <b>0,86</b> |
|                                                                                                              |         |                  | <b>200</b> | <b>0,85</b> | <b>0,87</b> | <b>0,82</b> | <b>0,85</b> | <b>0,85</b> |            |             |
|                                                                                                              |         |                  | 300        | 0,75        | 0,85        | 0,78        | 0,84        | 0,83        |            |             |
|                                                                                                              |         |                  | 400        | 0,75        | 0,82        | 0,80        | 0,82        | 0,82        |            |             |
| miRNASeq                                                                                                     | 1046    | 209              | 5          | 0,80        | 0,80        | 0,79        | 0,80        | 0,80        | <b>24</b>  | <b>0,84</b> |
|                                                                                                              |         |                  | 10         | 0,80        | 0,82        | 0,78        | 0,82        | 0,80        |            |             |
|                                                                                                              |         |                  | <b>20</b>  | <b>0,81</b> | <b>0,84</b> | <b>0,77</b> | <b>0,83</b> | <b>0,83</b> |            |             |
|                                                                                                              |         |                  | 30         | 0,64        | 0,72        | 0,73        | 0,80        | 0,79        |            |             |
|                                                                                                              |         |                  | 40         | 0,60        | 0,68        | 0,68        | 0,78        | 0,78        |            |             |
| <b>OXF.BRC.1 and OXF.BRC.2 breast cancer patient samples from the Gene Expression Omnibus (GEO), N = 201</b> |         |                  |            |             |             |             |             |             |            |             |
| Gene Expression                                                                                              | 21439   | 4288             | Prototype  |             |             |             |             | Prototype   | Index      |             |
|                                                                                                              |         |                  | 100        | 0,80        | 0,82        | 0,76        | 0,79        | 0,78        | <b>237</b> | <b>0,85</b> |
|                                                                                                              |         |                  | <b>200</b> | <b>0,83</b> | <b>0,86</b> | <b>0,81</b> | <b>0,83</b> | <b>0,83</b> |            |             |
|                                                                                                              |         |                  | 300        | 0,74        | 0,84        | 0,78        | 0,82        | 0,82        |            |             |
|                                                                                                              |         |                  | 400        | 0,74        | 0,78        | 0,76        | 0,82        | 0,81        |            |             |
| miRNA Expression                                                                                             | 734     | 147              | 5          | 0,76        | 0,82        | 0,76        | 0,82        | 0,81        | <b>30</b>  | <b>0,84</b> |
|                                                                                                              |         |                  | 10         | 0,76        | 0,83        | 0,73        | 0,82        | 0,82        |            |             |
|                                                                                                              |         |                  | <b>20</b>  | <b>0,81</b> | <b>0,84</b> | <b>0,80</b> | <b>0,83</b> | <b>0,83</b> |            |             |
|                                                                                                              |         |                  | 30         | 0,64        | 0,74        | 0,72        | 0,78        | 0,76        |            |             |
|                                                                                                              |         |                  | 40         | 0,62        | 0,68        | 0,69        | 0,76        | 0,75        |            |             |
| <b>MSK.PRCA prostate cancer patient samples from Memorial Sloan-Kettering Cancer Center (MSKCC), N=88</b>    |         |                  |            |             |             |             |             |             |            |             |
| Gene Expression                                                                                              | 26446   | 5200             | Prototype  |             |             |             |             | Prototype   | Index      |             |
|                                                                                                              |         |                  | <b>100</b> | <b>0,86</b> | <b>0,89</b> | <b>0,87</b> | <b>0,88</b> | <b>0,89</b> | 532        | 0,85        |
|                                                                                                              |         |                  | 200        | 0,84        | 0,88        | 0,87        | 0,88        | 0,89        |            |             |
|                                                                                                              |         |                  | 300        | 0,83        | 0,87        | 0,83        | 0,86        | 0,87        |            |             |
|                                                                                                              |         |                  | 400        | 0,76        | 0,84        | 0,82        | 0,86        | 0,86        |            |             |
| miRNA Expression                                                                                             | 368     | 75               | <b>5</b>   | <b>0,83</b> | <b>0,84</b> | <b>0,83</b> | <b>0,85</b> | <b>0,84</b> | 2          | 0,81        |
|                                                                                                              |         |                  | 10         | 0,74        | 0,82        | 0,80        | 0,81        | 0,82        |            |             |
|                                                                                                              |         |                  | 15         | 0,67        | 0,79        | 0,72        | 0,79        | 0,80        |            |             |
|                                                                                                              |         |                  | 20         | 0,57        | 0,70        | 0,69        | 0,80        | 0,79        |            |             |
|                                                                                                              |         |                  | 500        | 0,71        | 0,81        | 0,80        | 0,85        | 0,86        |            |             |
| Copy Number                                                                                                  | 18000   | 3600             | <b>100</b> | <b>0,85</b> | <b>0,86</b> | <b>0,85</b> | <b>0,86</b> | <b>0,87</b> | 258        | 0,84        |
|                                                                                                              |         |                  | 200        | 0,85        | 0,85        | 0,85        | 0,85        | 0,85        |            |             |
|                                                                                                              |         |                  | 300        | 0,84        | 0,80        | 0,80        | 0,84        | 0,84        |            |             |
|                                                                                                              |         |                  | 400        | 0,83        | 0,79        | 0,78        | 0,82        | 0,83        |            |             |
|                                                                                                              |         |                  | 500        | 0,81        | 0,78        | 0,76        | 0,82        | 0,83        |            |             |
| Clinical                                                                                                     | 9       | -                | -          | -           | -           | -           | -           | -           |            |             |
| <b>TCGA.GBM glioblastoma multiform samples from The Cancer Genome Atlas (TCGA), N = 167</b>                  |         |                  |            |             |             |             |             |             |            |             |
| Gene Expression                                                                                              | 12042   | 2408             | Prototype  |             |             |             |             | Prototype   | Index      |             |
|                                                                                                              |         |                  | <b>50</b>  | <b>0,85</b> | <b>0,87</b> | <b>0,82</b> | <b>0,86</b> | <b>0,87</b> | 306        | 0,86        |
|                                                                                                              |         |                  | 100        | 0,79        | 0,86        | 0,79        | 0,85        | 0,86        |            |             |
|                                                                                                              |         |                  | 150        | 0,67        | 0,83        | 0,79        | 0,84        | 0,85        |            |             |
|                                                                                                              |         |                  | 200        | 0,65        | 0,79        | 0,77        | 0,84        | 0,84        |            |             |
| miRNA Expression                                                                                             | 534     | 107              | <b>5</b>   | <b>0,84</b> | <b>0,84</b> | <b>0,85</b> | <b>0,85</b> | <b>0,84</b> | 2          | 0,79        |
|                                                                                                              |         |                  | 10         | 0,83        | 0,84        | 0,78        | 0,84        | 0,84        |            |             |
|                                                                                                              |         |                  | 15         | 0,67        | 0,83        | 0,76        | 0,83        | 0,83        |            |             |
|                                                                                                              |         |                  | 20         | 0,63        | 0,80        | 0,74        | 0,81        | 0,81        |            |             |
|                                                                                                              |         |                  | 250        | 0,62        | 0,80        | 0,79        | 0,83        | 0,84        |            |             |
| <b>TCGA.OVG ovarian cancer patient samples from The Cancer Genome Atlas (TCGA), N=93</b>                     |         |                  |            |             |             |             |             |             |            |             |
| Protein Expression                                                                                           | 166     | -                | Prototype  |             |             |             |             | Prototype   | Index      |             |
|                                                                                                              |         |                  | 5          | 0,82        | 0,83        | 0,77        | 0,82        | 0,82        | 32         | 0,79        |
|                                                                                                              |         |                  | <b>10</b>  | <b>0,82</b> | <b>0,83</b> | <b>0,78</b> | <b>0,84</b> | <b>0,82</b> |            |             |
|                                                                                                              |         |                  | 15         | 0,73        | 0,83        | 0,76        | 0,83        | 0,72        |            |             |
|                                                                                                              |         |                  | 25         | 0,66        | 0,82        | 0,77        | 0,82        | 0,81        |            |             |
| miRNA Expression                                                                                             | 800     | 201              | <b>5</b>   | <b>0,84</b> | <b>0,84</b> | <b>0,84</b> | <b>0,85</b> | <b>0,84</b> | 31         | 0,81        |
|                                                                                                              |         |                  | 10         | 0,85        | 0,84        | 0,77        | 0,85        | 0,85        |            |             |
|                                                                                                              |         |                  | 15         | 0,77        | 0,84        | 0,81        | 0,85        | 0,85        |            |             |
|                                                                                                              |         |                  | 20         | 0,68        | 0,84        | 0,79        | 0,84        | 0,85        |            |             |
|                                                                                                              |         |                  | 25         | 0,64        | 0,83        | 0,77        | 0,83        | 0,83        |            |             |
| Gene Expression                                                                                              | 12043   | 3011             | <b>50</b>  | <b>0,84</b> | <b>0,85</b> | <b>0,81</b> | <b>0,85</b> | <b>0,84</b> | 423        | 0,81        |
|                                                                                                              |         |                  | 100        | 0,82        | 0,85        | 0,77        | 0,85        | 0,85        |            |             |
|                                                                                                              |         |                  | 200        | 0,74        | 0,83        | 0,75        | 0,83        | 0,83        |            |             |
|                                                                                                              |         |                  | 300        | 0,65        | 0,82        | 0,73        | 0,82        | 0,82        |            |             |
|                                                                                                              |         |                  | 400        | 0,63        | 0,78        | 0,71        | 0,81        | 0,81        |            |             |
| Clinical                                                                                                     | 25      | -                | -          | -           | -           | -           | -           | -           |            |             |

Figure 2 MSKCC step1 figure

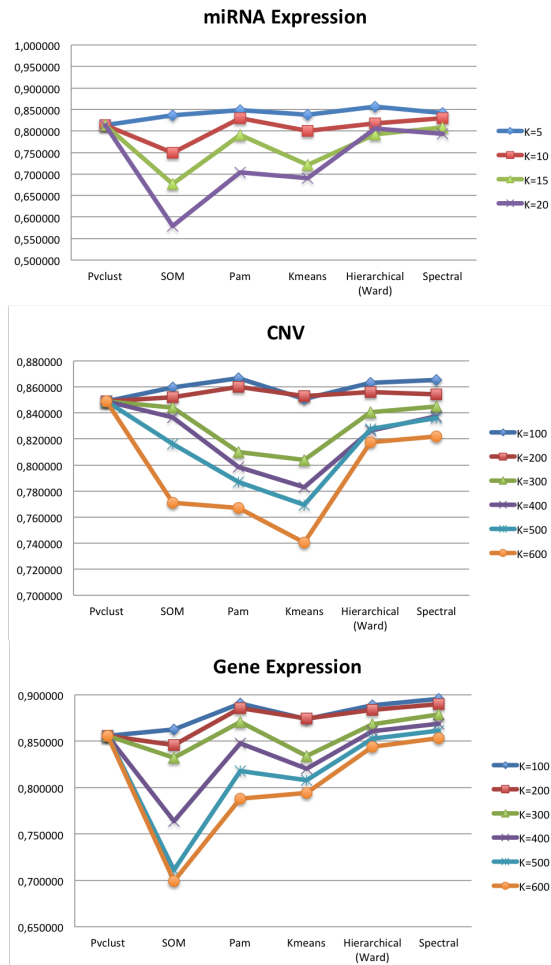



Figure 5 TCGA.OVG step1 figure

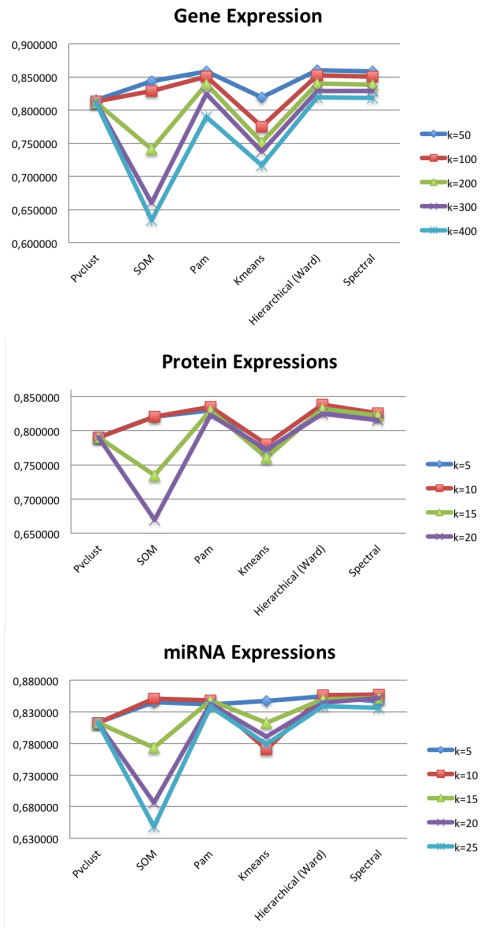

Figure 6 OXF.BRCA.1 and OXF.BRCA.2 step1 figure

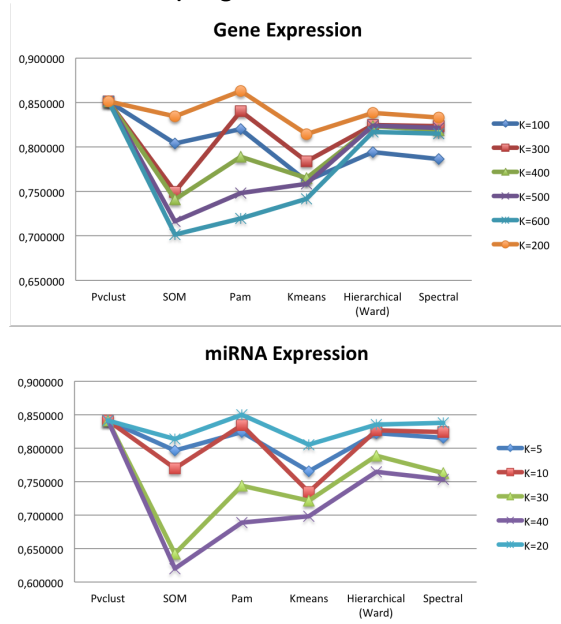

## Single view patients clustering

In this section summary results of single view patient clustering for each dataset are showed. The clustering algorithm reach the minimum impurity error percentage is also reported. Table 2 reports which cut is used in order to reach this results and also the algorithm (used in the first step of the methodology) from witch the prototype come from.

**Table 2** Single view clustering results after the feature selection step

| Dataset                                                                               | View               | Single View algorithm | Ranking       | Cut | Prototype from | N.Cluster | Error |
|---------------------------------------------------------------------------------------|--------------------|-----------------------|---------------|-----|----------------|-----------|-------|
| <b>Breast Cancer patients from The Cancer genome Atlas (TCGA), N = 151</b>            |                    |                       |               |     |                |           |       |
| TCGA.BRC                                                                              | RNASeq             | K-means               | Cat-t Score   | 60% | Pamk           | 4         | 0.17  |
|                                                                                       | miRNASeq           | K-means               | Cat-t Score   | 80% | Pamk           | 4         | 0.37  |
| <b>Breast Cancer patients Samples from The Gene Expression Omnibus (GEO), N = 201</b> |                    |                       |               |     |                |           |       |
| OXF.BRC.1                                                                             | Gene Expression    | K-means               | Random Forest | 70% | Pamk           | 4         | 0.17  |
|                                                                                       | miRNA Expression   | K-means               | Random Forest | 90% | Pvclust        | 4         | 0.32  |
| <b>Breast Cancer patients Samples from The Gene Expression Omnibus (GEO), N = 201</b> |                    |                       |               |     |                |           |       |
| OXF.BRC.2                                                                             | Gene Expression    | K-means               | Cat-t score   | 70% | Pvclust        | 4         | 0.47  |
|                                                                                       | miRNA Expression   | K-means               | Random Forest | 90% | Pamk           | 4         | 0.54  |
| <b>Breast Cancer patients from The Cancer genome Atlas (TCGA), N = 151</b>            |                    |                       |               |     |                |           |       |
| MSKCC.PRA                                                                             | Gene Expression    | K-means               | Cat-t score   | 80% | Pamk           | 2         | 0.31  |
|                                                                                       | miRNA Expression   | Pam                   | -             | -   | Pamk           | 2         | 0.39  |
|                                                                                       | Copy Number        | Ward                  | Random Forest | 90% | Spectral       | 2         | 0.31  |
|                                                                                       | Clinical           | Pam                   | -             | -   | -              | 2         | 0.37  |
| <b>Glioblastoma Multiforme patients from The Cancer genome Atlas (TCGA), N = 167</b>  |                    |                       |               |     |                |           |       |
| TCGA.GBM                                                                              | Gene Expression    | K-means               | Cat-t score   | 90% | Spectral       | 4         | 0.17  |
|                                                                                       | miRNA Expression   | K-means               | -             | -   | Ward           | 4         | 0.42  |
| <b>Glioblastoma Multiforme patients from The Cancer genome Atlas (TCGA), N = 398</b>  |                    |                       |               |     |                |           |       |
| TCGA.OVG                                                                              | Gene Expression    | K-means               | Random Forest | -   | Pamk           | 3         | 0.21  |
|                                                                                       | miRNA Expression   | K-means               | -             | -   | Pamk           | 3         | 0.20  |
|                                                                                       | Protein Expression | K-means               | -             | -   | -              | 3         | 0.22  |



## Final Results

In this section final results for all datasets are reported. All the results reported for the integration step refer to features obtained with the leave-one-out process. In particular table 3 shows cluster impurity errors and cluster stability computed for each dataset for the two integrative methods.

### Relevant Prototype for each subclass

For each cluster of patients a set of features coming from different data types was available. Each cluster was analysed in order to find the features that characterize it better. Two kinds of analysis were performed: the former was the correlation between patients in the cluster, the latter was related to the distribution of each variable in one sample in a cluster compared to all the other samples. In the first case, the most relevant features for each cluster were identified by evaluating how the correlation between patients in one cluster decrease when a feature was removed. The feature relevance is directly related to the correlation decrease. One feature at a time was removed and the correlation was evaluated. At the end the features were ranked and the first features for each view were selected. Figure 8 shows the most relevant features for each dataset. In the second case, features were ranked for each cluster according to their distribution. The key concept was that the variance of a relevant feature is low in the cluster and high between clusters. So were considered significant those features for which the difference between the variance out of the cluster and the variance in the cluster were highest. The features were ordered according to this criterion and for each cluster was observed what are the top key features. An example of results on TCGA.BRCA dataset is reported in (Figure 7).

### Class characterisation by visualisation

For inspection of the patient characteristics in each class, the distribution of each variable in a cluster was compared with its distribution in other clusters, using boxplots. A boxplot shows the median expression level (solid horizontal bar), the upper quartile and lower quartile range (shaded grey bar), the highest non-outlier and lowest non-outlier (smaller ticks joined by dashed lines), and any outlier (open circles). Because of the great amount of features the box-plot of all the variables cannot be visualized in a clear manner. So the features that gave more information on the difference between clusters were found. Analysis was started from cluster centroids. Feature were ranked by its variance between centroids. This means that the greater is the variance the greater is the difference between clusters for that feature. In (Figures 11), (Figure 12), (Figure 9) and (Figure 10) are reported the box-plot of each cluster calculated for these feature. Different behaviours in clusters related to different classes are clearly visible.

Figure 7 Variable Ranking according to the difference of variance inside and outside each cluster of the TCGA.BRCA dataset.

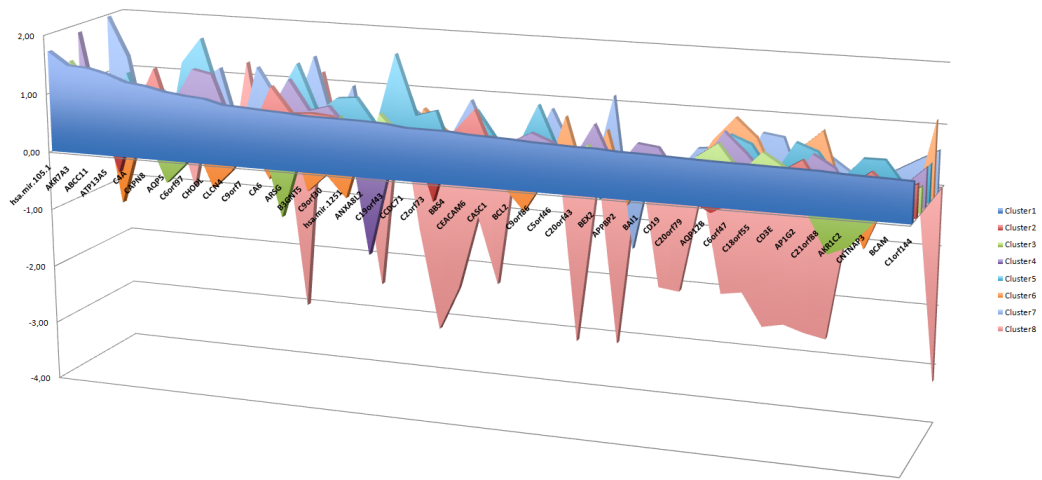

**Table 3** Final results: the table shows the results for all the datasets for all the four experiments executed both with the matrix factorization approach and the general linear integration method.

| <b>TCGA.BRC breast cancer patients from The Cancer Genome Atlas, N = 151</b>                 |                      |                  |                            |                  |  |
|----------------------------------------------------------------------------------------------|----------------------|------------------|----------------------------|------------------|--|
|                                                                                              | Matrix Factorization |                  | General Linear Integration |                  |  |
|                                                                                              | Error                |                  | Error                      |                  |  |
|                                                                                              | All Feature          | Selected Feature | All Feature                | Selected Feature |  |
| Semi supervised                                                                              | 12%                  | 5, 27%           | 13%                        | 23%              |  |
| Unsupervised                                                                                 | 34%                  | 26, 64%          | 29%                        | 27%              |  |
|                                                                                              |                      | Stability        |                            | Stability        |  |
|                                                                                              | All Feature          | Selected Feature | All Feature                | Selected Feature |  |
| Semi supervised                                                                              | 78%                  | 77%              | 72%                        | 73%              |  |
| Unsupervised                                                                                 | 76%                  | 76%              | 63%                        | 61%              |  |
| <b>OXF.BRC.1 breast cancer patients from the Gene Expression Omnibus, N = 201</b>            |                      |                  |                            |                  |  |
|                                                                                              | Matrix Factorization |                  | General Linear Integration |                  |  |
|                                                                                              | Error                |                  | Error                      |                  |  |
|                                                                                              | All Feature          | Selected Feature | All Feature                | Selected Feature |  |
| Semi supervised                                                                              | 9%                   | 8%               | 23%                        | 7%               |  |
| Unsupervised                                                                                 | 29%                  | 26%              | 23%                        | 29%              |  |
|                                                                                              |                      | Stability        |                            | Stability        |  |
|                                                                                              | All Feature          | Selected Feature | All Feature                | Selected Feature |  |
| Semi supervised                                                                              | 84%                  | 70%              | 78%                        | 69%              |  |
| Unsupervised                                                                                 | 84%                  | 63%              | 75%                        | 77%              |  |
| <b>OXF.BRC.2 breast cancer patients from the Gene Expression Omnibus, N = 201</b>            |                      |                  |                            |                  |  |
|                                                                                              | Matrix Factorization |                  | General Linear Integration |                  |  |
|                                                                                              | Error                |                  | Error                      |                  |  |
|                                                                                              | All Feature          | Selected Feature | All Feature                | Selected Feature |  |
| Semi supervised                                                                              | 25%                  | 15, 23%          | 16%                        | 30%              |  |
| Unsupervised                                                                                 | 47%                  | 33%              | 42%                        | 34%              |  |
|                                                                                              |                      | Stability        |                            | Stability        |  |
|                                                                                              | All Feature          | Selected Feature | All Feature                | Selected Feature |  |
| Semi supervised                                                                              | 82%                  | 77%              | 67%                        | 71%              |  |
| Unsupervised                                                                                 | 63%                  | 63%              | 75%                        | 74%              |  |
| <b>MSKCC.PRCA prostate cancer patients from Memorial Sloan-Kettering Cancer Center, N=88</b> |                      |                  |                            |                  |  |
|                                                                                              | Matrix Factorization |                  | General Linear Integration |                  |  |
|                                                                                              | Error                |                  | Error                      |                  |  |
|                                                                                              | All Feature          | Selected Feature | All Feature                | Selected Feature |  |
| Semi supervised                                                                              | 11%                  | 1%               | 10%                        | 5%               |  |
| Unsupervised                                                                                 | 36%                  | 34%              | 33, 20%                    | 35%              |  |
|                                                                                              |                      | Stability        |                            | Stability        |  |
|                                                                                              | All Feature          | Selected Feature | All Feature                | Selected Feature |  |
| Semi supervised                                                                              | 85%                  | 74%              | 73%                        | 88%              |  |
| Unsupervised                                                                                 | 88%                  | 72%              | 70%                        | 73%              |  |
| <b>TCGA.OVG ovarian cancer patient from The Cancer Genome Atlas, N = 398</b>                 |                      |                  |                            |                  |  |
|                                                                                              | Matrix Factorization |                  | General Linear Integration |                  |  |
|                                                                                              | Error                |                  | Error                      |                  |  |
|                                                                                              | All Feature          | Selected Feature | All Feature                | Selected Feature |  |
| Semi supervised                                                                              | 13%                  | 1, 5%            | 9%                         | 2%               |  |
| Unsupervised                                                                                 | 20%                  | 20%              | 21%                        | 21%              |  |
|                                                                                              |                      | Stability        |                            | Stability        |  |
|                                                                                              | All Feature          | Selected Feature | All Feature                | Selected Feature |  |
| Semi supervised                                                                              | 88%                  | 86%              | 80%                        | 75%              |  |
| Unsupervised                                                                                 | 98%                  | 97%              | 86%                        | 86%              |  |
| <b>TCGA.GBM glioblastoma multiform patients from The Cancer Genome Atlas, N = 167</b>        |                      |                  |                            |                  |  |
|                                                                                              | Matrix Factorization |                  | General Linear Integration |                  |  |
|                                                                                              | Error                |                  | Error                      |                  |  |
|                                                                                              | All Feature          | Selected Feature | All Feature                | Selected Feature |  |
| Semi supervised                                                                              | 15%                  | 7, 78%           | 20%                        | 12%              |  |
| Unsupervised                                                                                 | 36%                  | 26%              | 40%                        | 28%              |  |
|                                                                                              |                      | Stability        |                            | Stability        |  |
|                                                                                              | All Feature          | Selected Feature | All Feature                | Selected Feature |  |
| Semi supervised                                                                              | 88%                  | 87%              | 77%                        | 77%              |  |
| Unsupervised                                                                                 | 90%                  | 90%              | 76%                        | 73%              |  |

**Figure 8 Feature relevance:** for each multi-view clustering the most relevant features was identified in each cluster by evaluating the correlation reduction when a feature was removed. More relevant features are related to a greater decrease of the correlation reduction. Here are reported results only for the semi-supervised experiments that involve ranked prototypes. The x-axis reports the number of clusters while the y-axis reports the feature relevance. The feature relevance index goes from 1 (highly relevant) to 5 (not relevant).

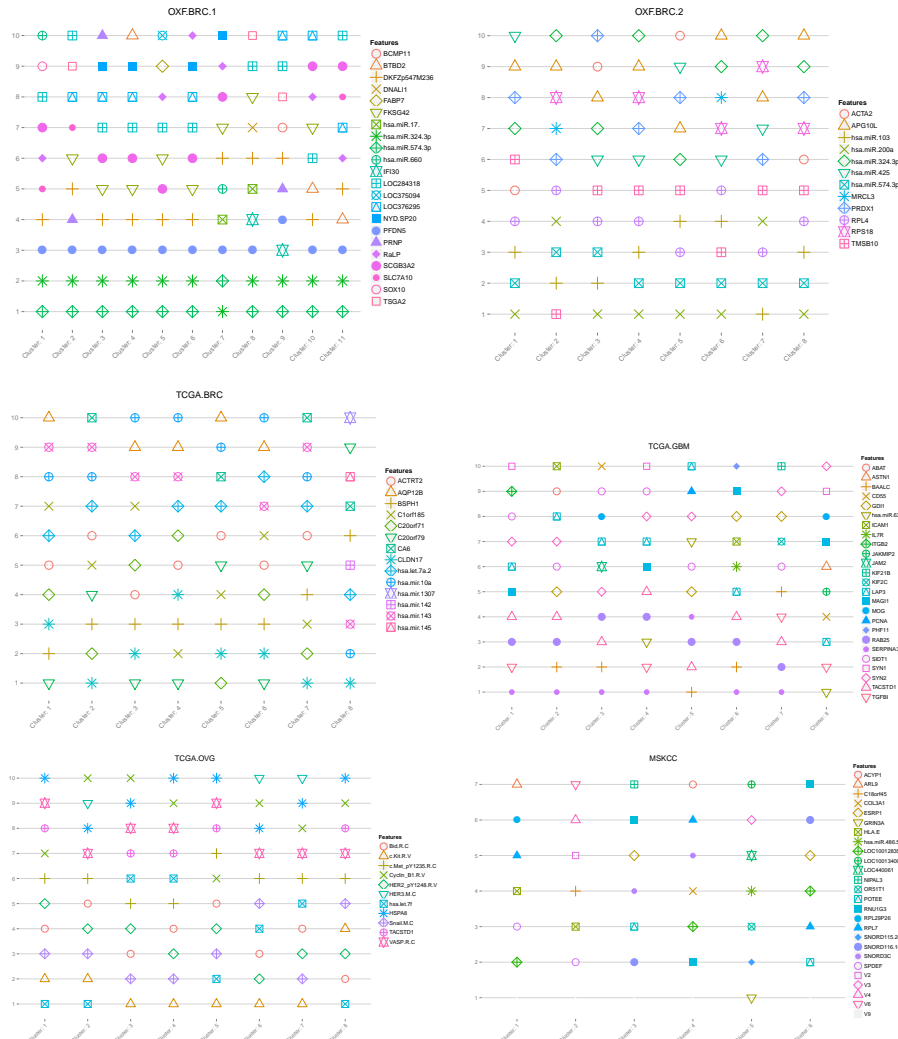

**Figure 9** Box-plots of the TCGA.OVG: The box-plots of TCGA.OVG dataset were calculated on the multi-view clustering results obtained with the matrix factorization approach in semi-supervised mode. For space and clarity reasons, the box-plots of patients were drawn only on the features with the highest variance between the centroids of different clusters.

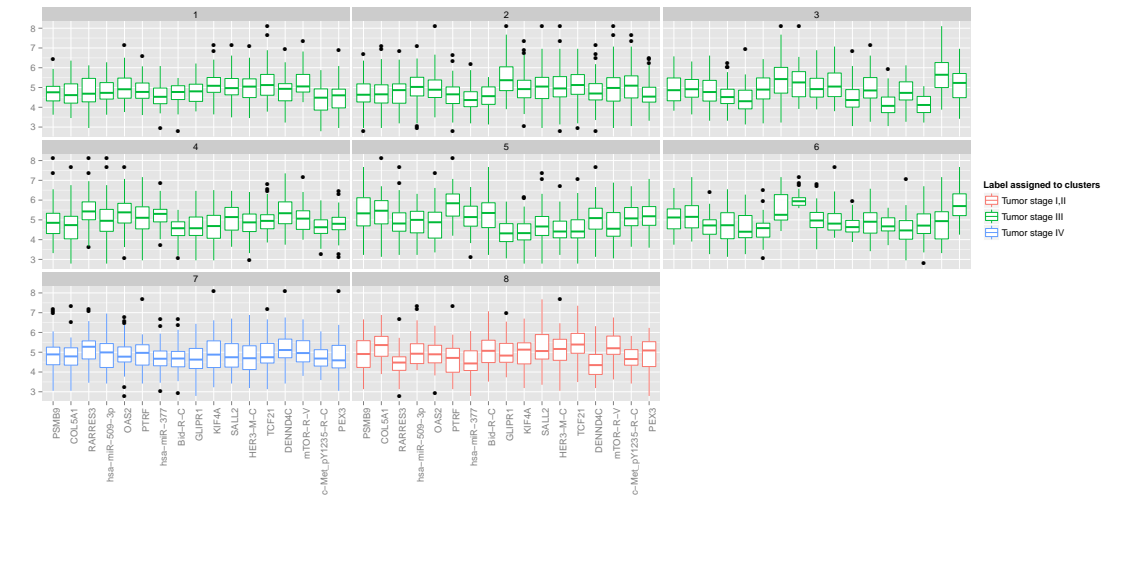

**Figure 10** Box-plots of the MSKCC.PRCA: The box-plots of MSKCC.PRCA dataset were calculated on the multi-view clustering results obtained with the matrix factorization approach in semi-supervised mode. For space and clarity reasons, the box-plots of patients were drawn only on the features with the highest variance between the centroids of different clusters.

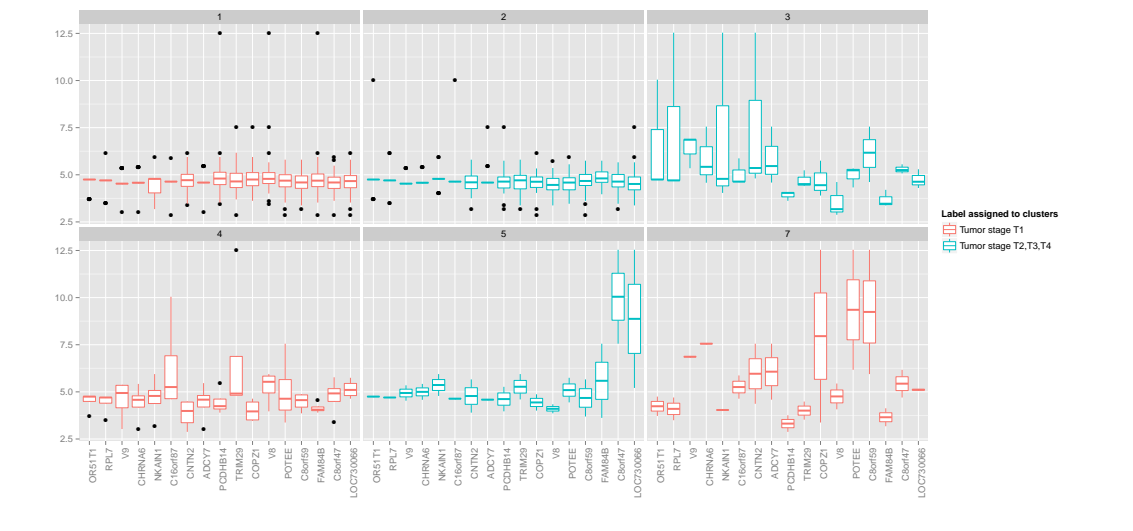

**Figure 11** Box-plots of the OXF.BRCA.1 and OXF.BRCA.2: The box-plots of OXF.BRCA.1 and OXF.BRCA.2 datasets were calculated on the multi-view clustering results obtained with the matrix factorization approach in semi-supervised mode. For space and clarity reasons, the box-plots of patients were drawn only on the features with the highest variance between the centroids of different clusters.

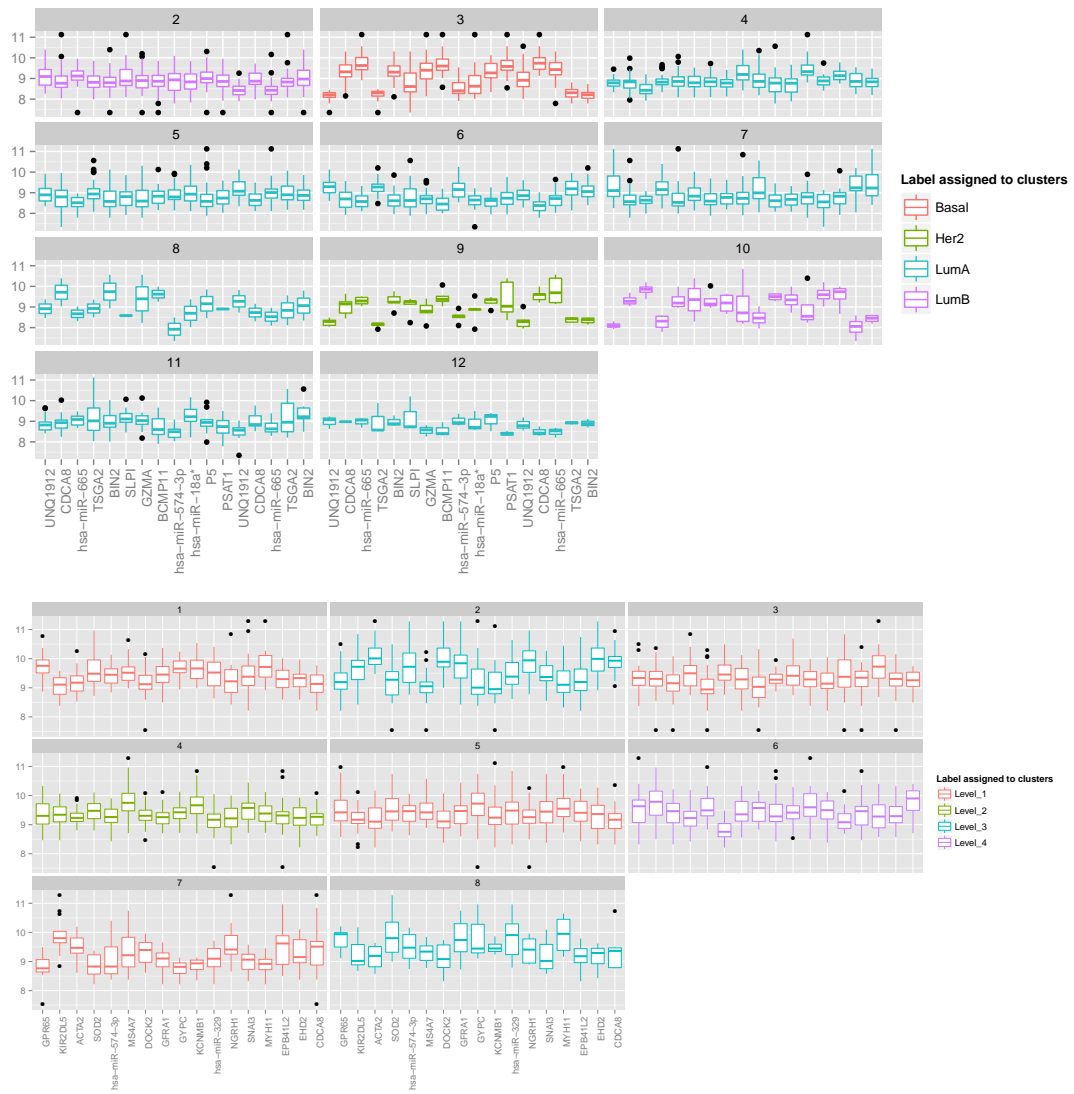

**Figure 12** Box-plots of the TCGA.BRCA and TCGA.GBM: The box-plots of TCGA.BRCA and TCGA.GMB datasets were calculated on the multi-view clustering results obtained with the matrix factorization approach in semi-supervised mode. For space and clarity reasons, the box-plots of patients were drawn only on the features with the highest variance between the centroids of different clusters.

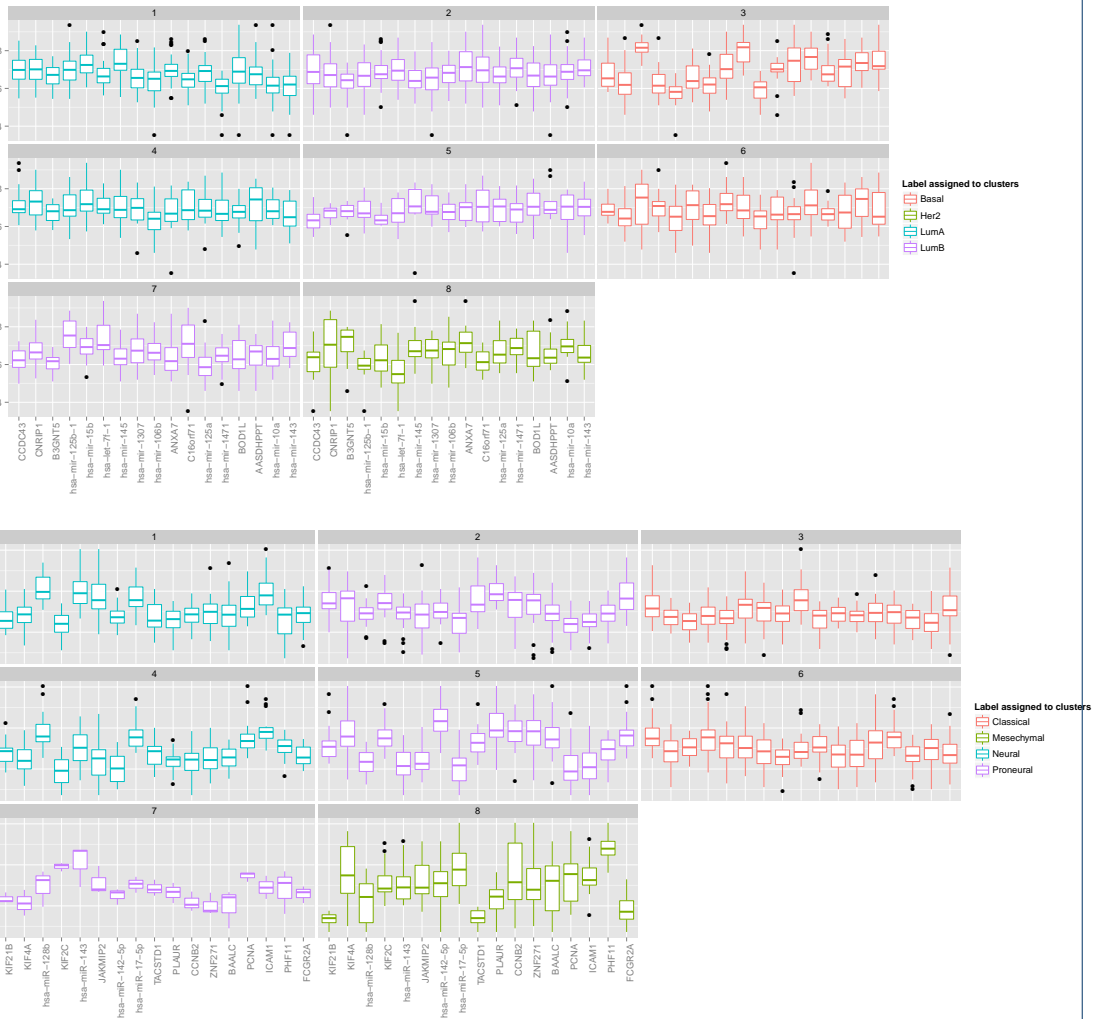

## Validation Results

The method as been compared with classical single view clustering algorithms, early and intermediate integration approach.

We calculated classification error and normalized mutual information (NMI) for each method, between each clustering results and real patient classification.

Given two clustering solutions C11 and C12 NMI compute the mutual information between the two clustering normalized by the cluster entropies.

Because we know how patients are categorized we compute NMI between clustering results and real patient classifications.

| TCGA.BRCA   |                                     | Algorithm | Error  | NMI |
|-------------|-------------------------------------|-----------|--------|-----|
| Single View | All Feature                         | Ward      | 26,49% | 41% |
|             |                                     | Kmeans    | 29,14% | 40% |
|             |                                     | Pamk      | 23,18% | 43% |
| Single View | Selected Prototype                  | Ward      | 30,49% | 41% |
|             |                                     | Kmeans    | 31,79% | 34% |
|             |                                     | Pamk      | 23,18% | 43% |
| Multi-View  | Early Integration                   | Tw-kmeans | 44,37% | 43% |
|             | Our method (unsupervised)           | MF        | 26,64% | 37% |
|             | Our method (semi-supervised)        | MF        | 5,27%  | 70% |
|             | Intermediate Integration (all feat) | SNF       | 26,00% | 38% |
|             | Intermediate Integration (our feat) | SNF       | 32,00% | 27% |

| TCGA.OV     |                                     | Algorithm | Error  | NMI |
|-------------|-------------------------------------|-----------|--------|-----|
| Single View | All Feature                         | Ward      | 23,51% | 3%  |
|             |                                     | Kmeans    | 22,04% | 3%  |
|             |                                     | Pamk      | 20,89% | 4%  |
| Single View | Selected Prototype                  | Ward      | 22,80% | 3%  |
|             |                                     | Kmeans    | 25,76% | 3%  |
|             |                                     | Pamk      | 21,02% | 4%  |
| Multi-View  | Early Integration                   | Tw-kmeans | 18,84% | 4%  |
|             | Our method (unsupervised)           | MF        | 20,00% | 8%  |
|             | Our method (semi-supervised)        | MF        | 1,50%  | 44% |
|             | Intermediate Integration (all feat) | SNF       | 20,00% | 4%  |
|             | Intermediate Integration (our feat) | SNF       | 20,50% | 3%  |

| MSKCC.PRCA  |                                     | Algorithm | Error  | NMI |
|-------------|-------------------------------------|-----------|--------|-----|
| Single View | All Feature                         | Ward      | 37,90% | 3%  |
|             |                                     | Kmeans    | 38,64% | 2%  |
|             |                                     | Pamk      | 37,50% | 3%  |
| Single View | Selected Prototype                  | Ward      | 37,50% | 3%  |
|             |                                     | Kmeans    | 35,23% | 4%  |
|             |                                     | Pamk      | 37,50% | 3%  |
| Multi-View  | Early Integration                   | Tw-kmeans | 27,27% | 3%  |
|             | Our method (unsupervised)           | GLI       | 33,20% | 10% |
|             | Our method (semi-supervised)        | MF        | 1,00%  | 72% |
|             | Intermediate Integration (all feat) | SNF       | 40,00% | 0%  |
|             | Intermediate Integration (our feat) | SNF       | 36,98% | 2%  |

| TCGA.GBM    |                                     | Algorithm | Error  | NMI |
|-------------|-------------------------------------|-----------|--------|-----|
| Single View | All Feature                         | Ward      | 17,96% | 58% |
|             |                                     | Kmeans    | 22,16% | 56% |
|             |                                     | Pamk      | 29,34% | 46% |
| Single View | Selected Prototype                  | Ward      | 18,96% | 58% |
|             |                                     | Kmeans    | 17,77% | 57% |
|             |                                     | Pamk      | 29,34% | 46% |
| Multi-View  | Early Integration                   | Tw-kmeans | 57,49% | 46% |
|             | Our method (unsupervised)           | MF        | 26,00% | 41% |
|             | Our method (semi-supervised)        | MF        | 7,78%  | 70% |
|             | Intermediate Integration (all feat) | SNF       | 24,00% | 45% |
|             | Intermediate Integration (our feat) | SNF       | 21,01% | 43% |

| OXF.BRCA.1  |                                     | Algorithm | Error  | NMI |
|-------------|-------------------------------------|-----------|--------|-----|
| Single View | All Feature                         | Ward      | 24,83% | 32% |
|             |                                     | Kmeans    | 22,39% | 31% |
|             |                                     | Pamk      | 22,86% | 32% |
| Single View | Selected Prototype                  | Ward      | 23,38% | 32% |
|             |                                     | Kmeans    | 20,87% | 34% |
|             |                                     | Pamk      | 22,89% | 32% |
| Multi-View  | Early Integration                   | Tw-kmeans | 25,87% | 32% |
|             | Our method (unsupervised)           | MF        | 26,00% | 41% |
|             | Our method (semi-supervised)        | GLI       | 7,00%  | 62% |
|             | Intermediate Integration (all feat) | SNF       | 24,00% | 29% |
|             | Intermediate Integration (our feat) | SNF       | 28,00% | 23% |

| OXF.BRCA.2  |                                     | Algorithm | Error  | NMI |
|-------------|-------------------------------------|-----------|--------|-----|
| Single View | All Feature                         | Ward      | 49,76% | 16% |
|             |                                     | Kmeans    | 51,24% | 16% |
|             |                                     | Pamk      | 50,75% | 16% |
| Single View | Selected Prototype                  | Ward      | 48,76% | 16% |
|             |                                     | Kmeans    | 50,75% | 17% |
|             |                                     | Pamk      | 50,75% | 16% |
| Multi-View  | Early Integration                   | Tw-kmeans | 48,76% | 16% |
|             | Our method (unsupervised)           | MF        | 33,00% | 33% |
|             | Our method (semi-supervised)        | MF        | 15,23% | 59% |
|             | Intermediate Integration (all feat) | SNF       | 51,00% | 13% |
|             | Intermediate Integration (our feat) | SNF       | 49,34% | 13% |
